# Supplementary material for: Different Biomarker Kinetics in Critically Ill Patients with High Lactate Levels
Source: PubMed Central journal article supplement (PMC7400035; doi:10.3390/diagnostics10070454), 2020-07-04
Supplement: diagnostics-10-00454-s001.pdf [file diagnostics-10-00454-s001.pdf]

# **Different biomarker kinetics in critically ill patients with high lactate levels**

Ryo Matsuura, M.D. Ph.D.<sup>1</sup>, Yohei Komaru, M.D.<sup>1</sup>, Yoshihisa Miyamoto, M.D.<sup>1</sup>, Teruhiko

Yoshida, M.D.<sup>1</sup>, Kohei Yoshimoto, M.D.<sup>2</sup>, Yoshifumi Hamasaki, M.D., Ph.D.<sup>1</sup>, Masaomi

Nangaku, M.D., Ph.D.<sup>1</sup> and Kent Doi, M.D., Ph.D.<sup>2\*</sup>

**Supplemental Table 1: Net reclassification improvement (NRI) and integrated discrimination improvement (IDI) for each model to predict ICU mortality.**

|                    | <b>NRI</b>           | <b>p-value</b> | <b>IDI</b>             | <b>p-value</b> |
|--------------------|----------------------|----------------|------------------------|----------------|
| <b>Overall</b>     |                      |                |                        |                |
| <b>Lac</b>         | reference            |                | reference              |                |
| <b>Lac + IL-6</b>  | -0.16 (-0.80 - 0.48) | 0.63           | 0.006 (-0.021 - 0.033) | 0.67           |
| <b>Lac + NGAL</b>  | 0.18 (-0.44 - 0.79)  | 0.57           | 0.007 (-0.017 - 0.031) | 0.57           |
| <b>Lac + HMGB1</b> | 0.05 (-0.55 - 0.65)  | 0.86           | 0.003 (-0.003 - 0.010) | 0.27           |
| <b>Non-sepsis</b>  |                      |                |                        |                |
| <b>Lac</b>         | reference            |                | reference              |                |
| <b>Lac + IL-6</b>  | 0.07 (-0.93 - 1.07)  | 0.89           | 0.033 (-0.050 - 0.116) | 0.44           |
| <b>Lac + NGAL</b>  | 0.51 (-0.37 - 1.39)  | 0.26           | 0.045 (-0.086 - 0.176) | 0.5            |
| <b>Lac + HMGB1</b> | 0.30 (-0.75 - 1.33)  | 0.58           | 0.018 (-0.067 - 0.102) | 0.68           |
| <b>Sepsis</b>      |                      |                |                        |                |
| <b>Lac</b>         | reference            |                | reference              |                |
| <b>Lac + IL-6</b>  | 0.09 (-0.94 - 1.12)  | 0.87           | 0.012 (-0.062 - 0.087) | 0.75           |
| <b>Lac + NGAL</b>  | 0.60 (-0.33 - 1.53)  | 0.21           | 0.121 (-0.023 - 0.265) | 0.1            |
| <b>Lac + HMGB1</b> | 0.13 (-0.88 - 1.14)  | 0.8            | 0.027 (-0.099 - 0.154) | 0.67           |
